# Supplementary material for: Goji berry leaf exerts a comparable effect against colitis and microbiota dysbiosis to its fruit in dextran-sulfate-sodium-treated mice
Source: Royal Society of Chemistry journal article supplement (doi:10.1039/d2fo02886g), 2023-01-01
Supplement: d2fo02886g1.pdf [file d2fo02886g1.pdf]

Supplementary Table 1.

Nutritional compositions of goji berry, mulberry, goji berry leaf and mulberry leaf

|                             | Goji berry<br>( <i>Lycium Barbarum</i> ) | Mulberry<br>( <i>Fructus Mori</i> ) | Goji berry leaf         | Mulberry leaf           |
|-----------------------------|------------------------------------------|-------------------------------------|-------------------------|-------------------------|
| Moisture (%)                | 7.31±0.91 <sup>b</sup>                   | 12.21±2.14 <sup>a</sup>             | 7.65±1.86 <sup>b</sup>  | 4.42±0.16 <sup>b</sup>  |
| Total protein (%)           | 3.54±0.11 <sup>d</sup>                   | 5.16±0.27 <sup>c</sup>              | 6.79±0.59 <sup>b</sup>  | 14.81±0.11 <sup>a</sup> |
| Total lipids (%)            | 0.73±0.06 <sup>b</sup>                   | 1.51±0.09 <sup>ab</sup>             | 3.06±1.28 <sup>a</sup>  | 2.38±0.36 <sup>ab</sup> |
| Total polyphenols (%)       | 0.67±0.02 <sup>c</sup>                   | 3.10±0.05 <sup>a</sup>              | 0.52±0.06 <sup>d</sup>  | 1.03±0.01 <sup>b</sup>  |
| Reducing sugars (%)         | 35.12±0.38 <sup>b</sup>                  | 57.91±0.21 <sup>a</sup>             | 1.63±0.02 <sup>d</sup>  | 2.71±0.10 <sup>c</sup>  |
| Soluble dietary fiber (%)   | 3.58±0.25 <sup>c</sup>                   | 1.00±0.11 <sup>d</sup>              | 6.65±0.35 <sup>b</sup>  | 11.00±0.10 <sup>a</sup> |
| Insoluble dietary fiber (%) | 6.13±0.20 <sup>c</sup>                   | 6.51±0.04 <sup>c</sup>              | 32.07±0.25 <sup>b</sup> | 51.40±1.55 <sup>a</sup> |
| Total dietary fiber (%)     | 9.71±0.07 <sup>c</sup>                   | 7.52±0.14 <sup>c</sup>              | 38.72±0.54 <sup>b</sup> | 62.40±1.60 <sup>a</sup> |
| Ash (%)                     | 4.97±0.38 <sup>c</sup>                   | 3.80±0.10 <sup>c</sup>              | 22.30±1.11 <sup>a</sup> | 12.10±1.01 <sup>b</sup> |
| Total Carbohydrate (%)      | 82.78±1.41 <sup>a</sup>                  | 74.23±2.18 <sup>b</sup>             | 59.68±1.17 <sup>c</sup> | 65.27±1.06 <sup>c</sup> |

Different lowercase letters show significant difference among groups (one-way ANOVA,  $p < 0.05$ ).
